# Supplementary material
Source: publisher figshare collection journal article supplement (https://asha.figshare.com/articles/dataset/_/8847845)
Supplement: Supplementary file 1 [file 1]

**Supplemental Material S1.** Discrimination between high- and low-frequency tones across three groups.

| <b>Group</b> | <b>Accuracy (%)</b> |           | <b>Response Time (s)</b> |            |
|--------------|---------------------|-----------|--------------------------|------------|
|              | <b>ST</b>           | <b>DT</b> | <b>ST</b>                | <b>DT</b>  |
| AOS          | 92 (10)             | 60 (27)   | 0.99 (.17)               | 1.23 (.30) |
| APH          | 90 (18)             | 64 (35)   | 1.11 (.51)               | 1.44 (.31) |
| Control      | 99 (01)             | 92 (03)   | 0.80 (.13)               | 1.34 (.29) |

*Note.* ST = single task; DT = dual task.
