# Supplementary material
Source: publisher figshare collection journal article supplement (https://asha.figshare.com/articles/dataset/_/8847845)
Supplement: Supplementary file 2 [file 1]

**Supplemental Material S2.** Two-way comparisons for speech fluency and tone discrimination variables.

|                                   |                   | <i>df</i> | <i>F</i> | <i>p</i> |
|-----------------------------------|-------------------|-----------|----------|----------|
| Word Count                        | Group             | 2         | 1.724    | .206     |
|                                   | Condition         | 1         | 3.673    | .071     |
|                                   | Group × Condition | 2         | 0.017    | .983     |
| Sample Duration                   | Group             | 2         | 6.478    | .008     |
|                                   | Condition         | 1         | 1.257    | .277     |
|                                   | Group × Condition | 2         | 0.068    | .935     |
| Speech Rate                       | Group             | 2         | 38.255   | < .001   |
|                                   | Condition         | 1         | 29.255   | < .001   |
|                                   | Group × Condition | 2         | 3.707    | .045     |
| Pause/Fill Time                   | Group             | 2         | 10.632   | .001     |
|                                   | Condition         | 1         | 32.854   | < .001   |
|                                   | Group × Condition | 2         | 1.093    | .356     |
| Repetitions per Syllable          | Group             | 2         | 5.834    | .011     |
|                                   | Condition         | 1         | 0.889    | .358     |
|                                   | Group × Condition | 2         | 2.698    | .094     |
| Tone Discrimination Accuracy*     | Group             | 2         | 5.895**  | .052     |
|                                   | Condition         | 1         | 13.366** | < .001   |
| Tone Discrimination Response Time | Group             | 2         | 1.262    | .307     |
|                                   | Condition         | 1         | 25.667   | < .001   |
|                                   | Group × Condition | 2         | 1.555    | .238     |

*Note.* \*Tone discrimination accuracy was analyzed with Kruskal-Wallis tests. All other variables were analyzed using ANOVAs. \*\**H* rather than *F* statistic.
